# Supplementary material
Source: Research Square preprint supplement (doi:10.21203/rs.3.rs-9074847/v1)
Supplement: Supplementary file 1 [file d2e8fcb0f0f75f34e643e2f6.docx]

**SUPPLEMENTARY**


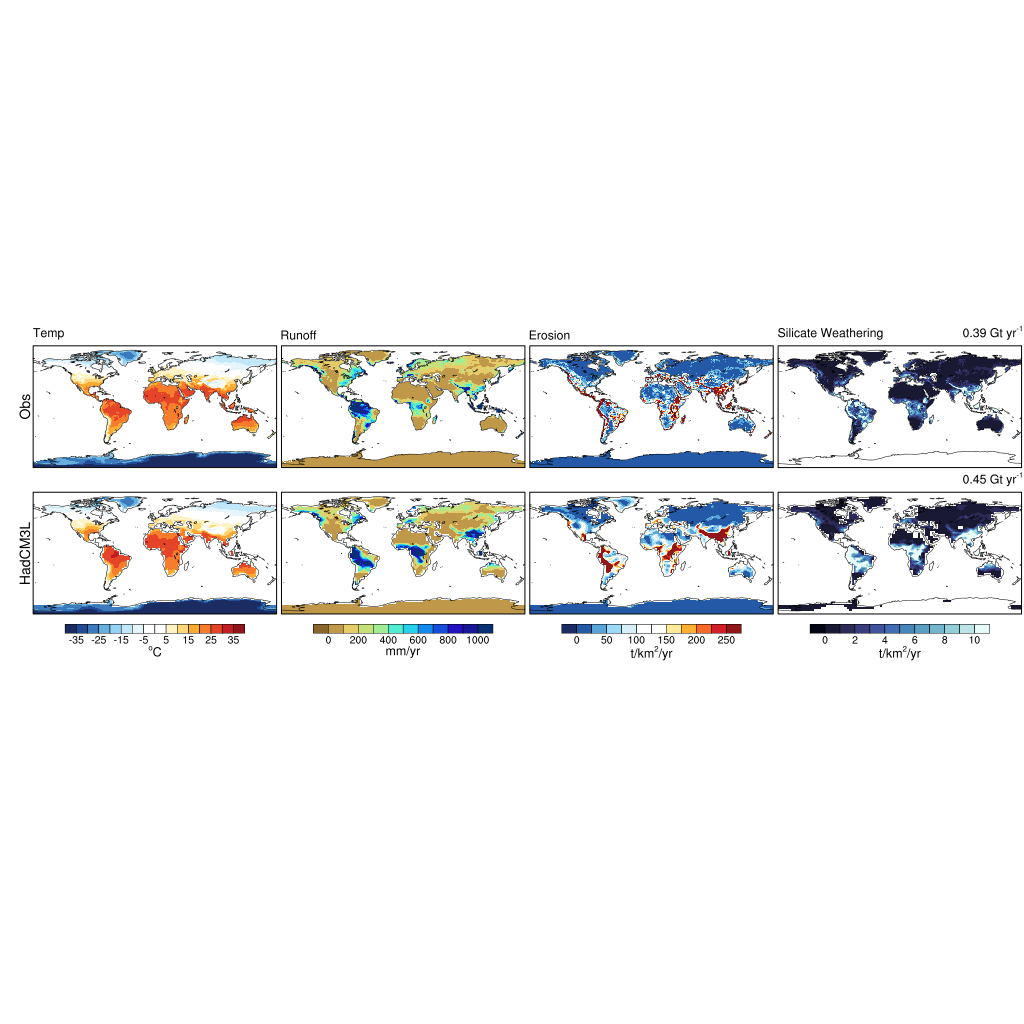


**S1. Comparison of observed and HadCM3L derived fields of the modern mean annual temperature and terrestrial runoff and subsequent silicate weathering model output.** Mean Annual Temperature (2m) derived from ECMWF Reanalysis v5 (ERA5) reanalysis data (Hersbach et al., 2020) averaged over the period 1981-2010. Runoff observations are taken from the long-term annual runoff from the GRUN data product averaged over the same period (Ghiggi et al., 2020).


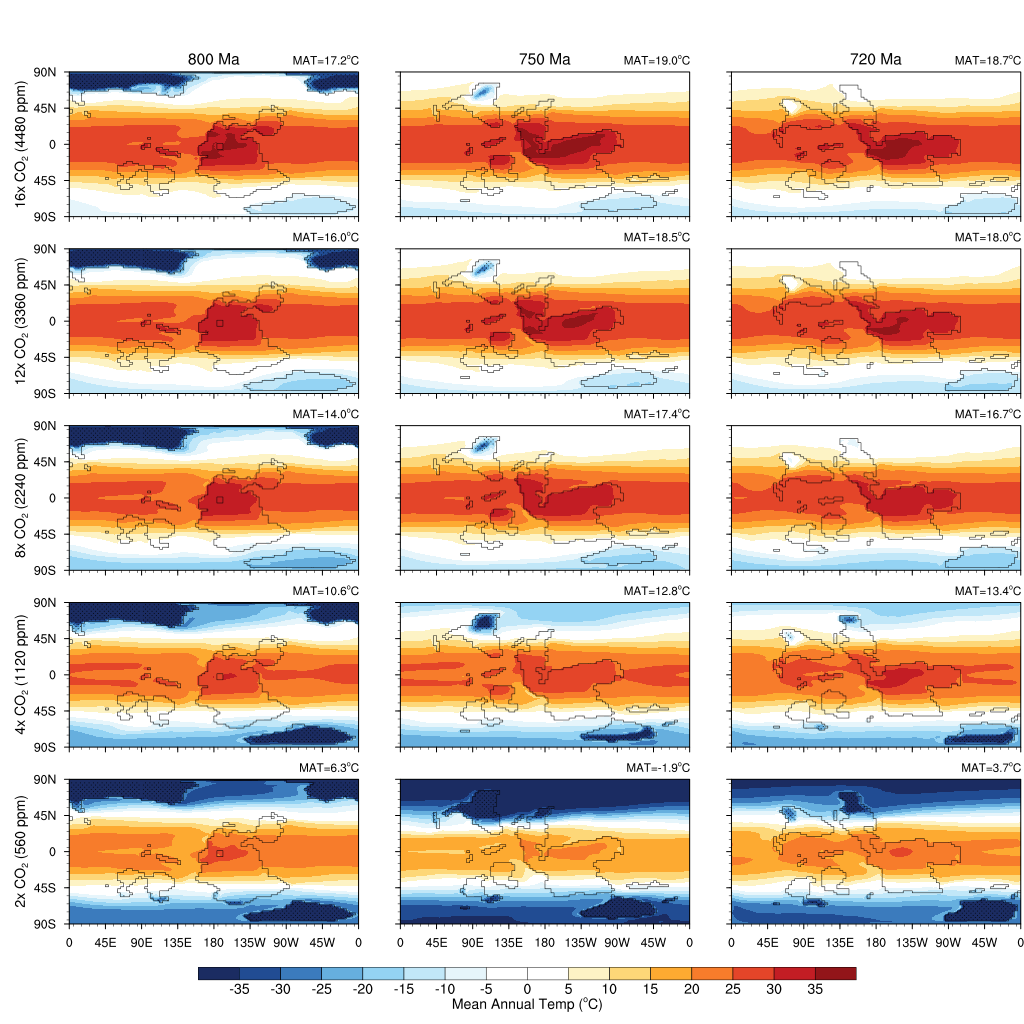


**S2. Temperature sensitivity as a function of Time (Ma) and atmospheric** **CO2.** HadCM3L predicted Mean Annual Temperature (MAT; oC) for the three palaeogeographies under all atmospheric *p*CO2 forcings. Also indicated is the globally integrated MAT.


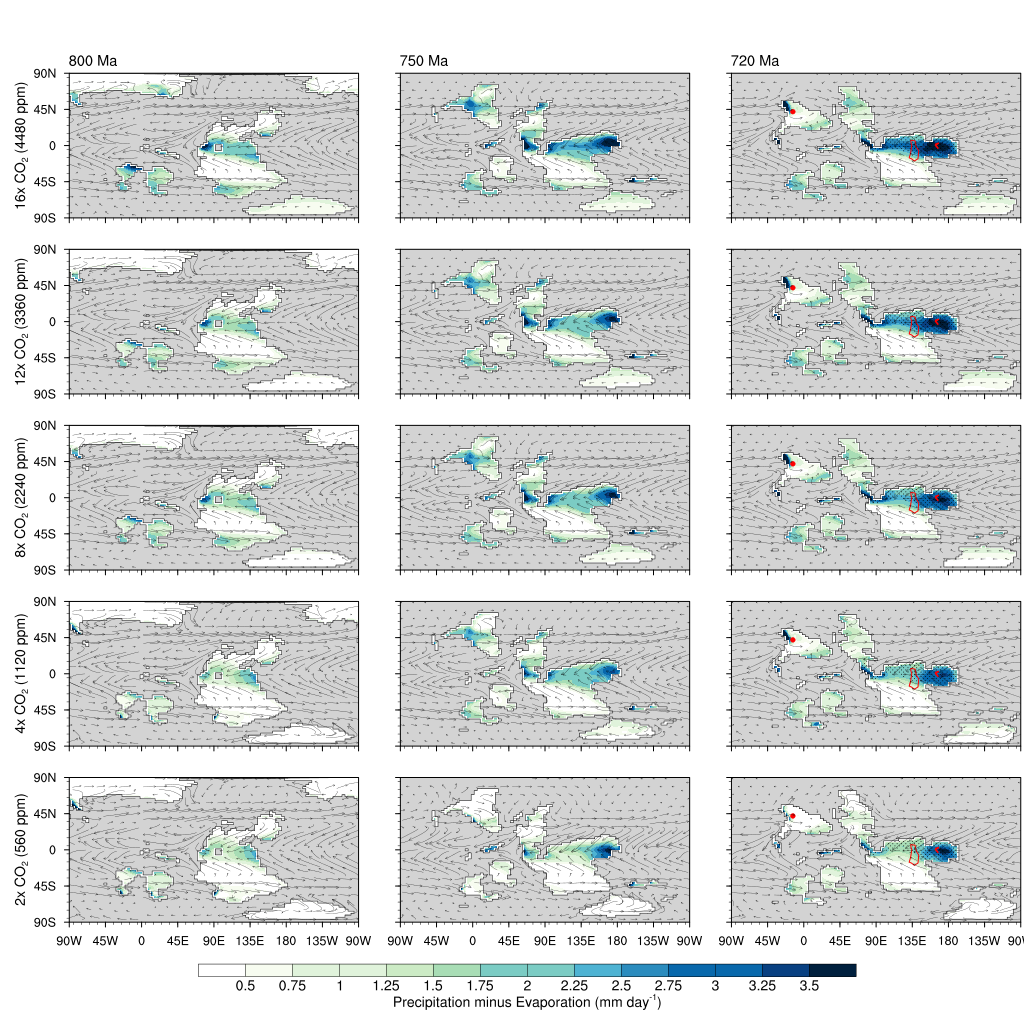


**S3. Land surface moisture balance and wind fields across the ensemble in Time (Ma) and atmosphericCO2.** Shown are positive component of the Mean Precipitation-Evaporation (P-E; mm day-1) for the three palaeogeographies under all atmospheric pCO2 forcings. For 720 Ma the red polygons indicate the Franklin-Irkutsk LIP volcanic terrane (Northern Canada, NW Greenland and southern Siberia), the red dot indicates the Hubei–Shaanxi Magmatic Province (South China), and dotted infill indicates the envelope of the Inter Tropical Convergence Zone. Also shown in grey streamlines are corresponding mean annual wind field.


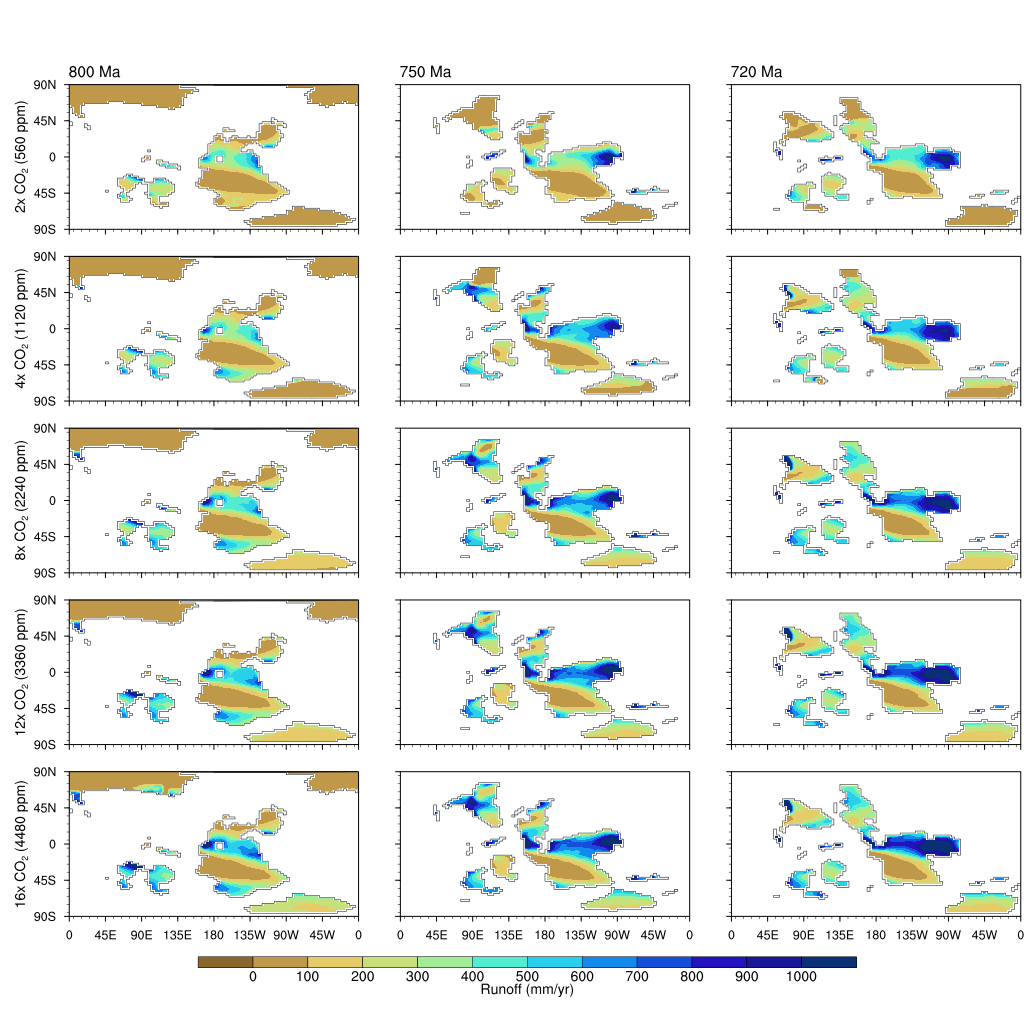
**S4. Terrestrial runoff across the ensemble in Time (Ma) and atmosphericCO2.** Shown are the combined surface and subsurface terrestrial runoff (mm/yr) as predicted by HadCM3L.

**
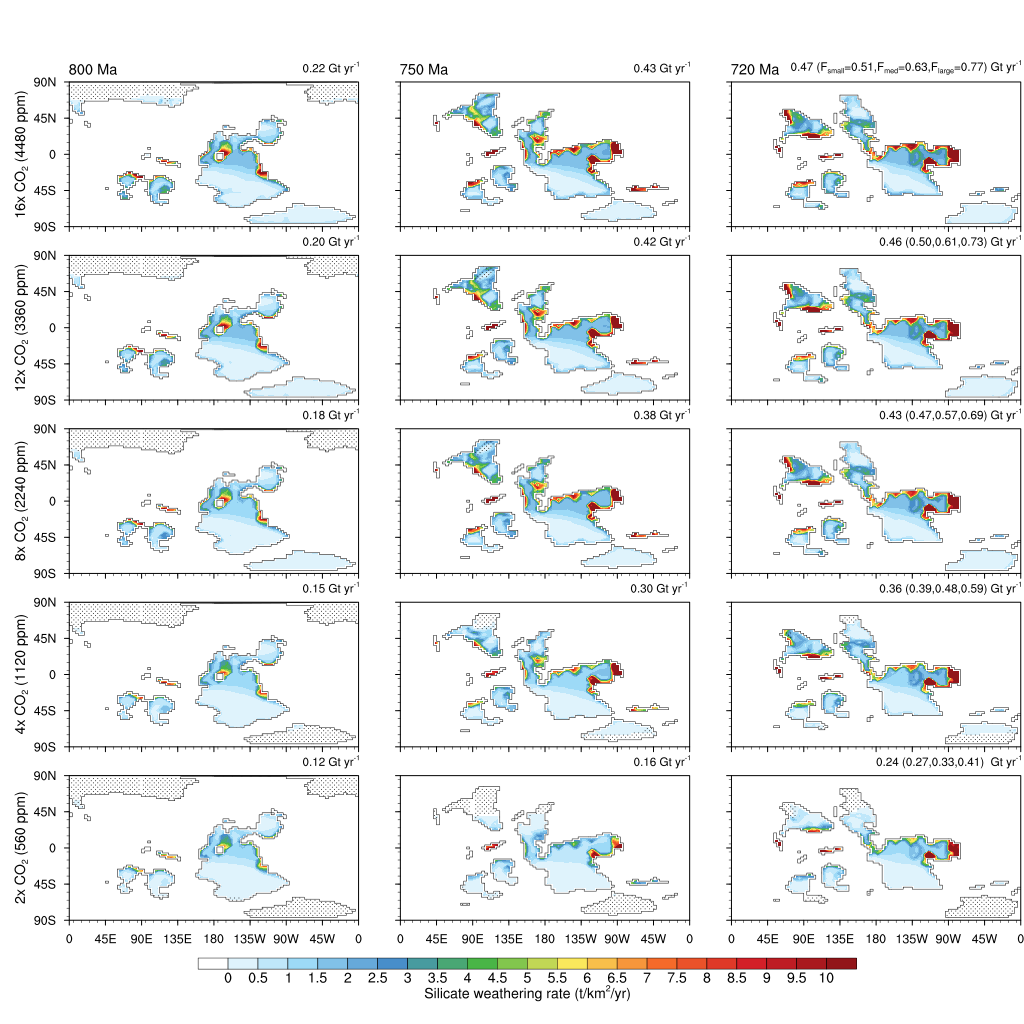
**

**S5. Global Silicate Weathering**. Shown are the silicate weathering rates for non-LIP configurations (according to the boundary conditions within the HadCM3L climate model). Global means are indicated in top right of each subfigure, those in parenthesis for 720 Ma are for different Franklin LIP configurations, Fsmall , Fmed, and Flarge. Dotted areas indicate extent of continental-scale ice sheets within the GCM.
